# Supplementary material for: Evaluation of the Effect of Inhibiting Lipid Oxidation of Natural Plant Sources in a Meat Model System
Source: Hindawi journal article supplement (doi:10.1155/2021/6636335), 2021-06-03
Supplement: f1 [file 6636335.f1.docx]

**Evaluation of the effect of inhibiting lipid oxidation of natural plant sources in a meat model system**

Sang-Keun Jina, Gap-Don Kimb,c,*, Jin-Yeon Jeonga,*

*aDepartment of Animal Resources Technology, Gyeongsang National University, Jinju, 52725, Republic of Korea*

*bGraduate School of International Agricultural Technology, Seoul National University, Pyeongchang 25354, Republic of Korea*

*cInstitutes of Green Bio Science & Technology, Seoul National University, Pyeongchang 25354, Republic of Korea*

*Corresponding author: G.D. Kim, Tel. +82-33-339-5778, Fax. +82-33-339-5779, E-mail address: gapdonkim@snu.ac.kr; J.Y. Jeong, Tel. +82-55-751-3283, Fax. +82-55-751-3689, E-mail address: jinyeon.jeong2@gmail.com

Table S1. Natural sources used for antioxidant in meat and meat products

| Plant name | Scientific classification | Application forms | Meat systems | Phytochemicals | Functionalities | References |
| --- | --- | --- | --- | --- | --- | --- |
| Noni | *Morinda citrifolia* | Puree | Beef patties |  | Antioxidant  Color stability | Tapp et al., 2012 |
| Juice  Powder |  | Total phenols | Free radical scavenging activity | Yang et al., 2007 |
| Celery | *Apium graveoens* | Extracts |  | Total phenols  Apigenin  Luteolin  Kaempferol  Caffeic acid  Ferulic acid  *p*-Coumaric acid | Free radical scavenging activity | Yao & Ren, 2011 |
| Powder | Emulsion-type sausage |  | Antioxidant | Jin et al., 2018 |
| Blackcurrant | *Ribes nigrum* | Dry matter |  | Total polyphenols | Antioxidant | Michalska et al., 2017 |
|  |  | Extracts |  | Polyphenols | Free radical scavenging activity  Ferric reducing ability | Teleszko & Wojdyło, 2015 |
| Extracts | Pork patties | Anthocyanins  Flavonols | Free radical scavenging activity | Jia et al., 2012 |
| Elderberry | *Sambucus latipinna* | Juice  Wine  Extracts  Puree |  | Anthocyanins  Flavonols  Phenolic acids | Antioxidant  Health benefit | Sider et al., 2015 |
| Blueberry | *Vaccinium corymbosum* | Dried |  | Total phenols  Anthocyanins | Free radical scavenging activity | Martín-Gómez et al., 2020 |
| Aronia | *Aronia melanocarpa* | Extracts |  | Polyphenols | Free radical scavenging activity  Ferric reducing ability | Teleszko & Wojdyło, 2015 |
| Juice | Meat model system |  | Antioxidant | Burri et al., 2020 |
| Extracts |  | Anthocyanins  Flavonols  Flavan-3-ols  Hydroxycinnamic acids  Chlorogenic acid  Neochlorogenic acid  Proanthyocyanins | Antioxidant | Denev et al., 2012 |
| Lettuce | *Lactuca sativa* | Fresh  Dried |  | Polyphenols  Vitamin C | Free radical scavenging activity  Ferric reducing ability | Llorach et al., 2008 |
| Apple | *Malus domestica* | Extracts |  | Polyphenols | Free radical scavenging activity  Ferric reducing ability | Teleszko & Wojdyło, 2015 |
| Pomace powder | Ground meat |  | Antioxidant | Rather et al., 2015 |
| Thistle | *Silybum marianum* | Extracts |  | Total phenols  Flavonols | Free radical scavenging activity | Conforti et al., 2009 |
| Cinnamon | *Cinnamomum verum* | Powder | Ground meat |  | Antioxidant | Jayathilakan et al., 2007 |
| Essential oil | Fresh sausage |  | Antioxidant | Zhang et al. 2019 |
| Green tea | *Camellia sinensis* | Extracts | Ground meat | Catechin | Antioxidant | Tian et al., 2019 |
| Fermented |  | Total phenols  Flavonoids | Free radical scavenging activity | Cardoso et al., 2020 |
| Extract | Beef patty |  | Antioxidant | Bañón et al. 2007 |
| Ginger | *Zingiber officinale* | Eextract | Smoked buffalo meat |  | Antioxidant | Anandh et al. 2014. |
| Powder | Pork burgers |  | Antioxidant  Free radical scavenging activity | Mancini et al., 2019 |
| Extract |  | Total Phenols | Antioxidant  Ferric reducing ability  Free radical scavenging  activity | Tohma et al., 2016 |
| Onion | *Allium cepa* | Juice | Cooked turkey breast |  | Antioxidant | Tang & Cronin. 2007 |
| Extracts |  | Total phenols | Free radical scavenging activity | Liguori et al., 2017 |
| Clove | *Syzygium aromaticum* | Powder | Pork sausage | Total phenolic compounds | Free radical scavenging activity | Jin et al., 2016 |
| Extracts |  | Total phenolic compounds  Flavonoids | Free radical scavenging activity | El-Maati et al. 2016 |
| Garlic | *Allium sativum* | Ground | Chicken sausage |  | Antioxidant | Sallam et al. 2004 |
| Extracts |  | Total compound | antioxidant | Chung et al. 2006 |
| Soybean | *Glycine max* | Extracts |  | Total phenolic compounds | Free radical scavenging activity | Petropoulos et al., 2018 |
| Paste |  | Total polyphenols  Flavonoids | Free radical scavenging activity | Yang et al., 2018a |
| Soy sauce | Marinated pork meat |  | Antioxidant | Yang et al., 2018b |
| Cherry berry | *Prunus avium* | Extracts | Sausage | Polyphenols | Antioxidant | Nowak et al., 2016 |
| Ginseng | *Panax ginseng* |  | Ground |  | Antioxidant | Yan et al., 2011 |
| Extracts |  | Polysaccharides | Free radical scavenging activity | Chen & Huang, 2019 |
| Extracts |  | Polysaccharides | Antioxidant | Kim et al., 2020 |
| Chili pepper | *Capsicum annuum* | Paste |  | Total polyphenols  flavonoids | Free radical scavenging activity | Yang et al.,2018a |
| Radish | *Raphanus raphanistrum* | Powder | Fermented cooked sausages |  | Antioxidant | Ozaki et al., 2020 |
| Extracts | Pork meat |  | Antioxidant | Jung et al., 2009 |
| Grape | *Vitis labrusca L.* | Extract | Raw and cooked chicken hamburger | Phenolics | TBARS | Selani et al. 2011 |
| Red wine |  | Anthocyanins | Free radical scavenging activity | Kharadze et al., 2018 |
| Red wine | Frankfurter-type sausage |  | Antioxidant | Feng et al., 2016 |

**References**

Anandh, M.A.; Lakshmana, V. Storage stability of smoked buffalo rumen meat product treated with ginger extract. *J Food Sci Technol* **2014**, 51(6),1191–1196.

Bañón, S.; Díaz, P.; Rodríguez, M.; Garrido, M.D.; Price, A. Ascorbate, green tea and grape seed extracts increase the shelf life of low sulphite beef patties. *Meat Sci* **2007**, 77, 626–633.

Burri, S.C.M.; Ekholm, A.; Bleive, U.; Püssa, T.; Jensen, M.; Hellström, J.; et al. Lipid oxidation inhibition capacity of plant extracts and powders in a processed meat model system. *Meat Sci* **2020**, 162, 108033.

Cardoso, R.R. Neto, R.O.; dos Santos D’Almeida, C.T.; do Nascimento, T.P.; Pressete, C.G.; Azevedo, L.; et al. Kombuchas from green and black teas have different phenolic profile, which impacts their antioxidant capacities, antibacterial and antiproliferative activities. *Food Res Int* **2020**, 128, 108782.

Chen, F.; Huang, G. Antioxidant activity of polysaccharides from different sources of ginseng. *Int J Biol Macromol* **2019**, 125, 906–908.

Chung, L.Y. The antioxidant properties of garlic compounds: Allyl cysteine, Alliin, Allicin and Allyl disulfide. *J Med Food* **2006**, 9(2), 205–13.

Coforti, F.; Sosa, S.; Marrelli, M.; Menichini, F.; Statti, G.A.; Uzunov, D.; Tubaro, A.; Menichini, F. The protective ability of Mediterranean dietary plants against the oxidative damage: The role of radical oxygen species in inflammation and the polyphenol, flavonoid and sterol contents. *Food Chem* **2009**, 112, 587–594.

Denev, P.N.; Kratchanov, C.G.; Ciz, M.; Lojek, A.; Kratchanova, M.G. Bioavailability and antioxidant activity of black chokeberry (Aronia melanocarpa) polyphenols: in vitro and in vivo evidences and possible mechanisms of action: A review. *Compr Rev Food Sci Food Safety* **2012**, 11(5), 471–489.

El-Maatti, M.F.A.; Mahgoub, S.A.; Labib, S.M.; Al-Gaby, A.M.A.; Ramadan, M.F. Phenolic extracts of clove (Syzygium aromaticum) with novel antioxidant and antibacterial activities. *Eur J Integr Med* **2016**, 8, 494–504.

Feng, X.; Sebranek, J.G.; Lee, H.Y.; Ahn, D.U. Effect of adding red wine on the physicochemical properties and sensory characteristics of uncured frankfurter-type sausage. *Meat Sci* **2016**, 121, 285–291.

Jayathilakan, K.; Sharma, G.K.; Radhakrishna, K.; Bawa, A.S. Antioxidant potential of synthetic and natural antioxidants and its effect on warmed-over-flavour in different species of meat. *Food Chem* **2007**, 105, 908–916.

Jia, N.; Kong, B.; Liu, Q.; Diao, X.; Xia, X. Antioxidant activity of black currant (Ribes nigrum L.) extract and its inhibitory effect on lipid and protein oxidation of pork patties during chilled storage. *Meat Sci* **2012**, 91(4), 533–539.

Jin, S.K.; Choi, J.S.; Jeong, J.Y.; Kim, G.D. The effect of clove bud powder at a spice level on antioxidant and quality properties of emulsified pork sausage during cold storage. *J Sci Food Agr* **2016**, 96(12), 4089–4097.

Jin, S.K.; Choi, J.S.; Yang, H.S.; Park, T.S.; Yim, D.G. Natural curing agents as nitrite alternatives and their effects on the physicochemical, microbiological properties and sensory evaluation of sausages during storage. *Meat Sci* **2018**, 146, 34–40.

Jung, D.C.; Lee, S.Y.; Yoon, J.H.; Hong, K.P.; Kang, Y.S.; Park, S.R.; et al. Inhibition of pork and fish oxidation by a novel plastic film coated with horseradish extract. *LWT - Food Sci Technol* **2009**, 42, 856–861.

Kim, H.M.; Song, Y.; Hyun, G.H.; Long, N.P.; Park, J.H.; Hsieh, Y.S.Y.; Kwon, S.W. Characterization and antioxidant activity determination of neutral and acidic polysaccharides form Panax Ginseng C. A. Meyer. *Molecules* **2020**, 25, 791.

Kharadze, M.; Japaridze, I.; Kalandia, A.; Vanidze, M. Anthocyanins and antioxidant activity of red wines made from endemic grape varieties. *Ann Agrar Sci* **2018**, 16, 181–184.

Llorach, R.; Martínez-Sánchez, A.; Tomás-Barberán, F.A.; Gil, M.I.; Ferreres, F. Characterisation of polyphenols and antioxidant properties of five lettuce varieties and escarole. *Food Chem* **2008**, 108, 1028–1038.

Liguori, L.; Califano, R.; Albanese, D.; Raimo, F.; Crescitelli, A.; Matteo, M.D. Chemical composition and antioxidant properties of five white Onion (Allium cepa L.) Landraces. *J Food Qual* **2017**, 2017, 1–9.

Mancini, S.; Paci, G.; Dal Bosco, A.; Mattioli, S.; Preziuso, G. Effect of ginger powder addition on quality, fatty acids profile, lipid oxidation and antioxidant capacity of cooked pork burgers. *Eur Food Res Technol* **2019**, 245, 1377–1386.

Martín-Gómez, J.; Varo, M.Á.; Mérida, J.; Serratosa, M.P. Influence of drying processes on anthocyanin profiles, total phenolic compounds and antioxidant activities of blueberry (Vaccinium corymbosum). *LWT-Food Sci Technol* **2020**, 120, 108931.

Michalska, A.; Wojdyło, A.; Lech, K.; Łysiak, G.P.; Figiel, A. Effect of different drying techniques on physical properties, total polyphenols and antioxidant capacity of blackcurrant pomace powders. *LWT-Food Sci Technol* **2017**, 78, 114–121.

Nowak, A.; Czyzowska, A.; Efenberger, M.; Krala, L. Polypenolic extracts of cherry (Prunus cerasus L.) and blakcurrant (Ribes nigrum L.) leaves as natural preservatives in meat products. *Food Microbiol* **2016**, 59, 142–149.

Ozaki, M.M.; Munekata, P.E.S.; Lopes, A.S.; Nascimento, M.S.; Pateiro, M.; Lorenzo, J.M.; Pollonio, M.A.R. Using chitosan and radish powder to improve stability of fermented cooked sausages. *Meat Sci* **2020**, 167, 108165.

Petropoulos, S.; Fernandes, Â.; Barros, L.; Ciric, A.; Sokovic, M.; Ferreira, I.C.F.R. Antimicrobial and antioxidant properties of various Greek garlic genotypes. *Food Chem* **2018**, 245, 7–12.

Rather, S.A.; Akhter, R.; Masoodi, F.A.; Gani, A.; Wani, S.M. Utilization of apple pomace powder as a fat replacer in goshtaba: a traditional meat product of Jammu and Kashmir, India. *Food Measure*, 9, 389–399.

Sallam, K.I.; Ishioroshi, M.; Samejima, K. Antioxidant and antimicrobial effects of garlic in chicken sausage. *LWT-Food Sci Technol* **2004**, 37(8), 849-855.

Selani, M.M.; Contreras-Castillo, C.J.; Shirahigue, L.D.; Gallo, C.R.; Plata-Oviedo, M.; Montes-Villanueva, N.D. Wine industry residues extracts as natural antioxidants in raw and cooked chicken meat during frozen storage. *Meat Sci* **2011**, 88, 397–403.

Sidor, A.; Gramza-Michałowska, A. Advanced research on the antioxidant and health benefit of elderberry (*Sambucus nigra*) in food – a review. *J Funct Foods* **2015**, 18, 941–958.

Tang, X.; Cronin, D.A. The effects of brined onion extracts on lipid oxidation and sensory quality in refrigerated cooked turkey breast rolls during storage. *Food Chem* **2007**, 100(2), 712–718.

Tapp, W.N.; Yancey, J.W.S.; Apple, J.K.; Dikeman, M.E.; Godbee, R.G. Noni puree (Morinda citrifolia) mixed in beef fatties enhanced color stability. *Meat Sci* **2012**, 91, 131–136.

Teleszko, M.; Wojdyło, A. Comparison of phenolic compounds and antioxidant potential between selected edible fruits and their leaves. *J Funct Foods* **2015**, 14, 736–746.

Tohma, H.; Gülçin, Í; Bursal, E.; Gören, A.C.; Alwase, S.H.; Köksal, E. Antioxidant activity and phenolic compounds of ginger (Zingiber officinale Rosc.) determined by HPLC-MS/MS. *J Food Meas Charact* **2016**, 11, 556–566.

Yan, L.; Meng, W.; Lee, J.H.; Wang, J.P.; Kim, I.H. Effects of dietary wild-ginseng adventitious root meal on growth performance, blood profiles, relative organ weight and meat quality in broiler chickens. *Asian Australas J Anim Sci* **2010**, 24(2), 258–263.

Yang, H.J. Lee, Y.S.; Choi, I.S. Comparison of physicochemical properties and antioxidant activities of fermented soybean-based red pepper paste, Gocujang, prepared with five different red pepper (Capsicum annuum L.) varieties. *J Food Sci Technol* **2018a**, 55(2), 792–801.

Yang, J.; Paulino, R.; Janke-Stedronsky, S.; Abawi, F. Free-radical-scavenging activity and total phenols of noni (Morinda citrifolia L.) juice and powder in processing and storage. *Food Chem* **2007**, 102, 302–308.

Yang, Y.; Sun, Y.; Pan, D.; Wang, Y.; Cao, J. Effects of high pressure treatment on lipolysis-oxidation and volatiles of marinated pork meat in soy sauce. *Meat Sci* **2018b**, 145, 186–194.

Zhang, X.; Wang, H.; Li, S.; Sun, Y.; Pan, D.; Wang, Y.; Cao, J. Effect of cinnamon essential oil on the microbiological and physiochemical characters of fresh Italian style sausage during storage. *Anim Sci J* **2019**, 90, 435–444.
